# Supplementary material
Source: PubMed Central journal article supplement (PMC6676480)

## Covariance Analysis Between Total Choroid Plexus Volume & BACS Subscores

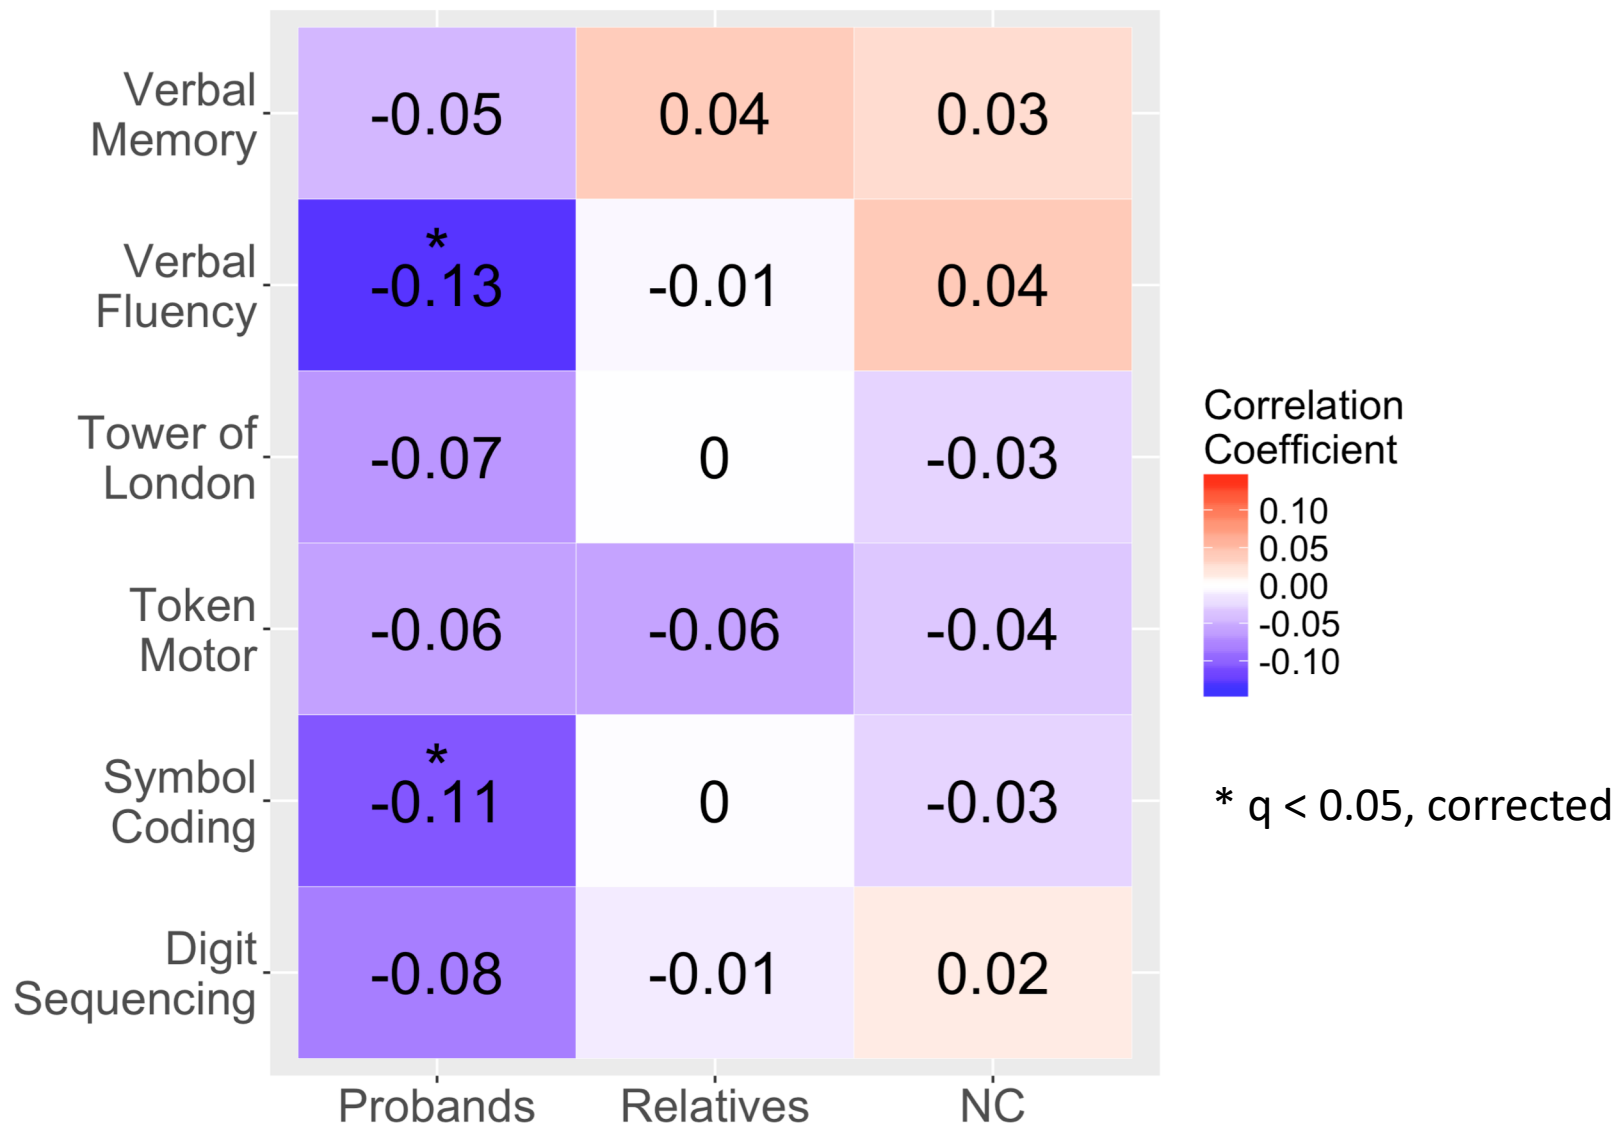

Supplement: NIHMS1525259-supplement-supp_figure.pdf [file NIHMS1525259-supplement-supp_figure.pdf]
